# Supplementary material for: Dramatic presentation of acquired thrombotic thrombocytopenic purpura associated with COVID-19
Source: PubMed Central journal article supplement — Haematologica. 2020 Jul 2;105(10):e540–1. doi: 10.3324/haematol.2020.262345 (PMC7556657; doi:10.3324/haematol.2020.262345), 2020-07-02
Supplement: 2020_262345-DisclosuresContributions.pdf [file 2020_262345-DisclosuresContributions.pdf]

Haematologica  
HAEMATOL/2020/262345  
Version 3

Dramatic presentation of acquired TTP associated with COVID-19

Marco Capecchi, Cristina Mocellin, Chiara Abbruzzese, Ilaria Mancini,  
Daniele Prati, and Flora Peyvandi

Disclosures: MC reports non-financial support from Novo Nordisk and Novartis outside of the submitted work. CM, CA and DP have no disclosures for this manuscript. FP reports advisory fees from Bioverativ, Roche, Sanofi, Takeda, and Sobi outside of the submitted work. IM has received honoraria for participating as a speaker at educational meetings organized by Instrumentation Laboratory and Sanofi.

Contributions: MC and FP developed the manuscript, drafting and revising the text and table. MC, CM, CA, DP and FP managed the patient, collected data and critically revised the manuscript. IM did the laboratory tests and critically revised the manuscript. All authors approved the final manuscript for submission.
